# Supplementary material
Source: MDPI journal article supplement (https://www.mdpi.com/2673-8929/1/4/42)
Supplement: s1 [file s1]

Archive with 1 entries (1 files):
- microplastics-1842270-supplementary.pdf
